# Supplementary material for: Fabrication of polyvinyl alcohol hydrogels with excellent shape memory and ultraviolet-shielding behavior via the introduction of tea polyphenols
Source: Royal Society of Chemistry journal article supplement (doi:10.1039/d0ra06053d), 2020-01-01
Supplement: d0ra06053d1.pdf [file d0ra06053d1.pdf]

## Supporting Information

### Fabrication of polyvinyl alcohol hydrogels with excellent shape memory and ultraviolet shielding behavior via introduction of healthcare matter tea polyphenols

Xike Xiong,<sup>a</sup> Jun Sun,<sup>a</sup> Di Hu,<sup>a</sup> Chao Xiao,<sup>a</sup> Jianjun Wang,<sup>a</sup> Qiqi Zhuo,<sup>\*b</sup> Chuanxiang Qin,<sup>\*a</sup> and Lixing Dai<sup>\*a</sup>

<sup>a</sup>College of Chemistry, Chemical Engineering and Materials Science, Soochow University, Suzhou, Jiangsu, 215123, People's Republic of China.

<sup>b</sup>College of Material Science & Engineering, Jiangsu University of Science and Technology, Zhenjiang, Jiangsu, 212003, People's Republic of China.

Corresponding author e-mail: [dailixing@suda.edu.cn](mailto:dailixing@suda.edu.cn); [qinchuanxiang@suda.edu.cn](mailto:qinchuanxiang@suda.edu.cn); [zqq88263268@just.edu.cn](mailto:zqq88263268@just.edu.cn)

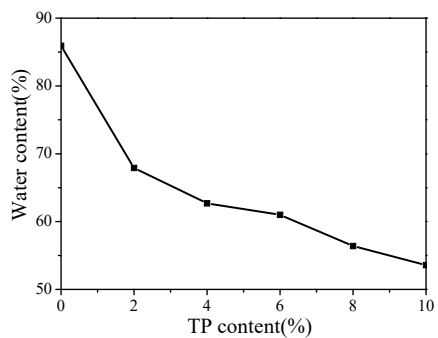

**Figure S1.** Water contents of the PVA/TP hydrogels measured at 25 °C as a function of TP content.

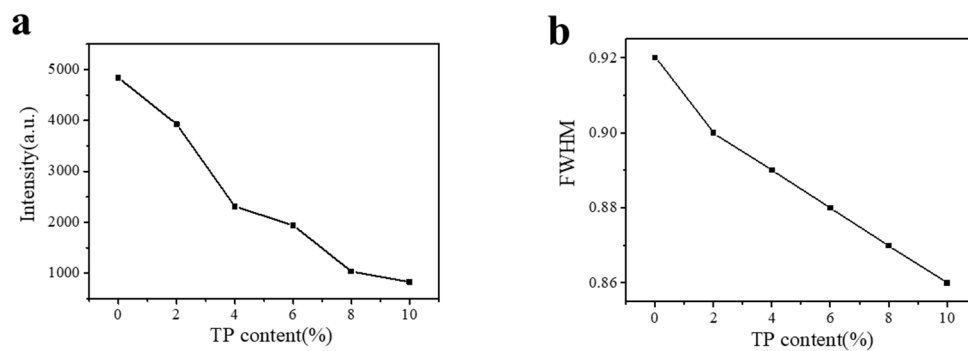

**Figure S2.** (a) Diffraction peak intensity and (b) FWHM at  $\theta = 20.3^\circ$  of the XRD pattern of PVA/TP hydrogels with different TP content.

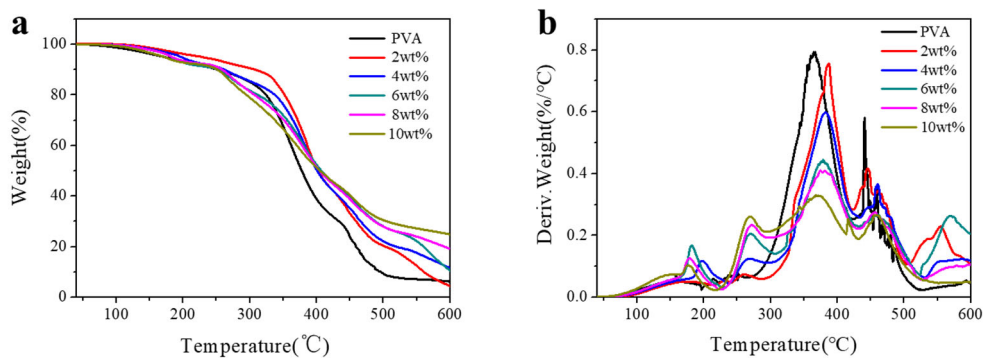

**Figure S3.** (a) TGA and (b) DTG curves of PVA/TP hydrogels with different TP loadings.

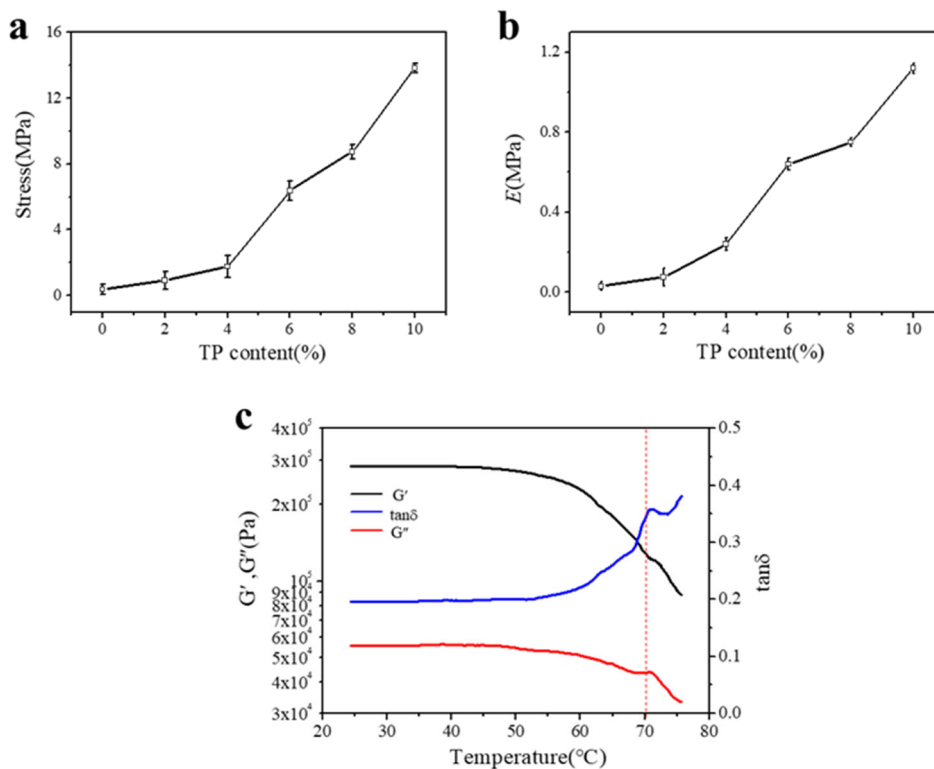

**Figure S4.** (a) Stress and (b) elastic moduli of PVA/TP hydrogels with different TP loadings. (c) Storage modulus ( $G'$ ), loss modulus ( $G''$ ), and loss factor ( $\tan\delta$ ) of the PVA/TP hydrogel (8 wt % TP) as a function of temperature.

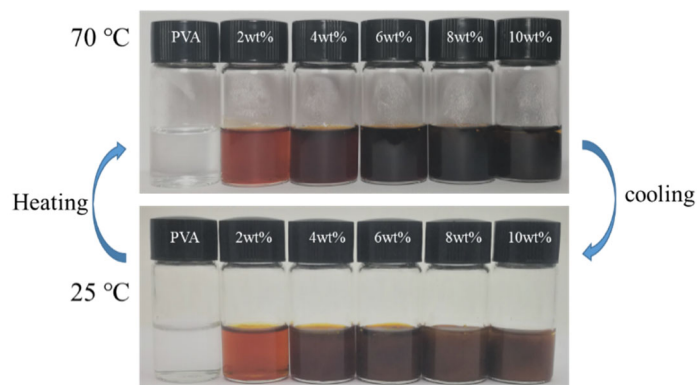

**Figure S5.** Photos of PVA/TP composite dispersions at different temperature.

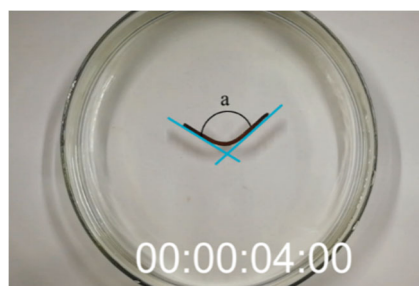

**Figure S6.** Schematic of angle measurement of a U-shaped PVA/TP hydrogel during shape recovering.

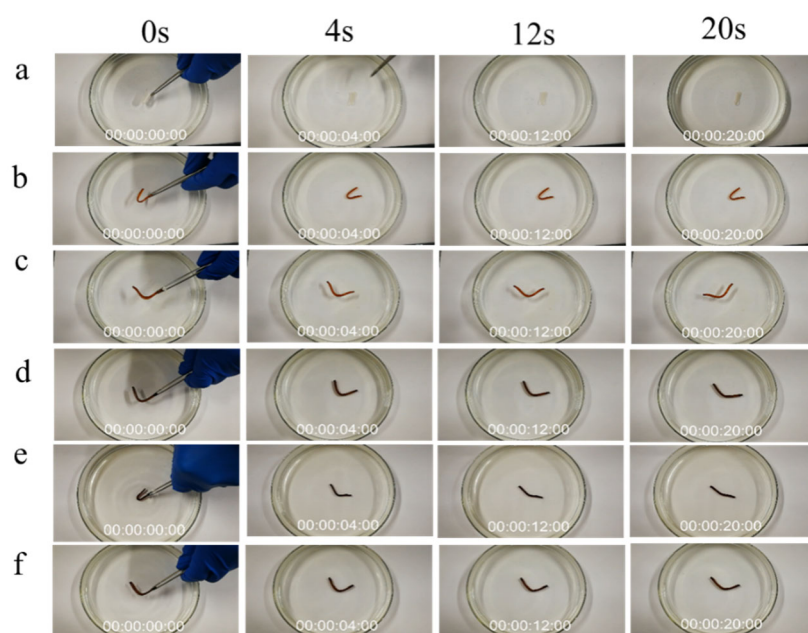

**Figure S7.** Shape memory behavior of PVA/TP hydrogels bent into U-shape in water at 50 °C. The content of TP in (a)-(f) corresponds to 0, 2, 4, 6, 8 and 10 wt%, respectively.

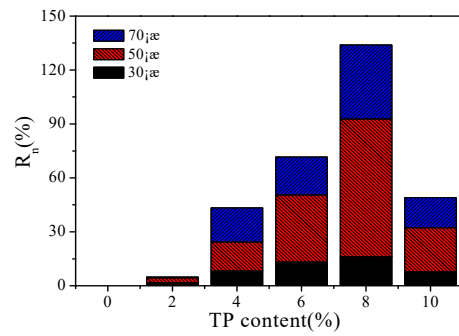

**Figure S8.** Net recovery rates ( $R_n$ ) of PVA/TP hydrogels with different TP loadings immersed in 30 °C, 50 °C and 70 °C water.

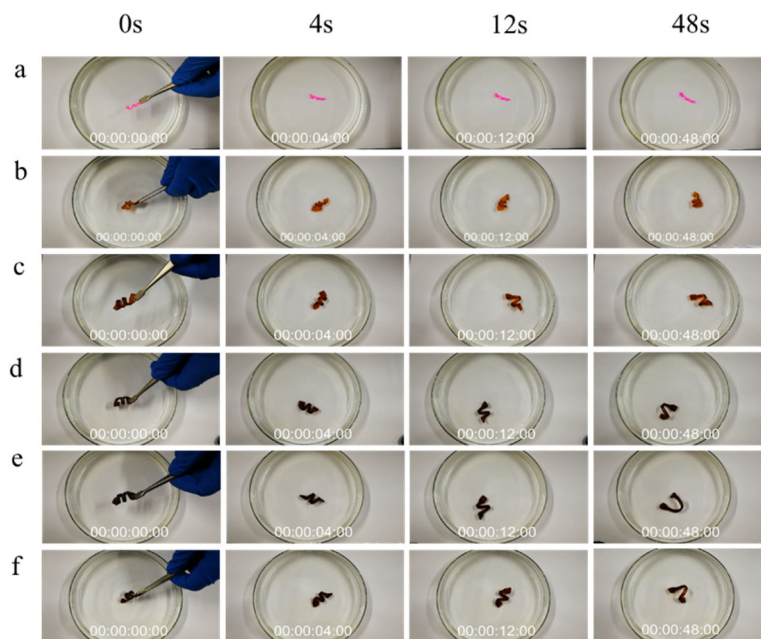

**Figure S9.** Shape memory behaviour of PVA/TP hydrogels bent into spring-like shape in 50 °C water. The content of TP in (a)-(f) corresponds to 0, 2, 4, 6, 8 and 10 wt%, respectively. In order to more clearly see the change of pure PVA (a), rhodamine B was added into the transparent PVA hydrogels.

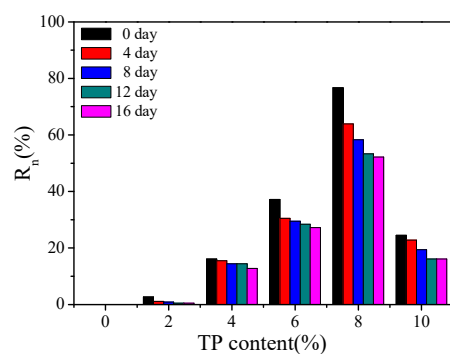

**Figure S10.** Net recovery rates ( $R_n$ ) of PVA/TP hydrogels with different TP loadings after UV aging 4, 8, 12 and 16 days.

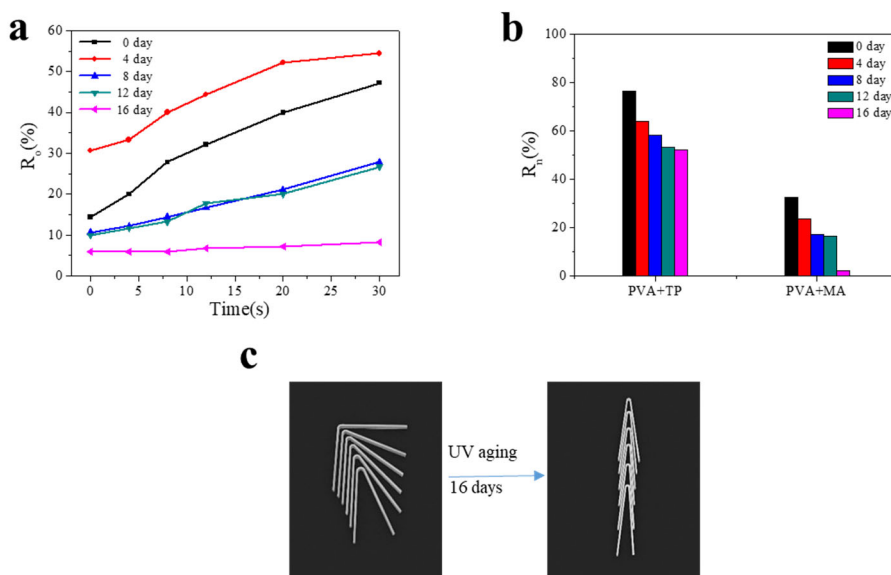

**Figure S11.** (a) Observed shape recovery rate ( $R_o$ ) of the PVA/MA hydrogel (MA loading was selected 1.5 wt%, with which the hydrogel showed the best shape memory behavior according to the literature<sup>1</sup>) after UV aging 4, 8, 12 and 16 days as a function of time, (b) Net recovery rate ( $R_n$ ) of the PVA/TP hydrogel and PVA/MA hydrogel after different UV aging time. (c) Schematic diagram of the shape recovery of PVA/MA hydrogels with (right) and without (left) UV irradiation.

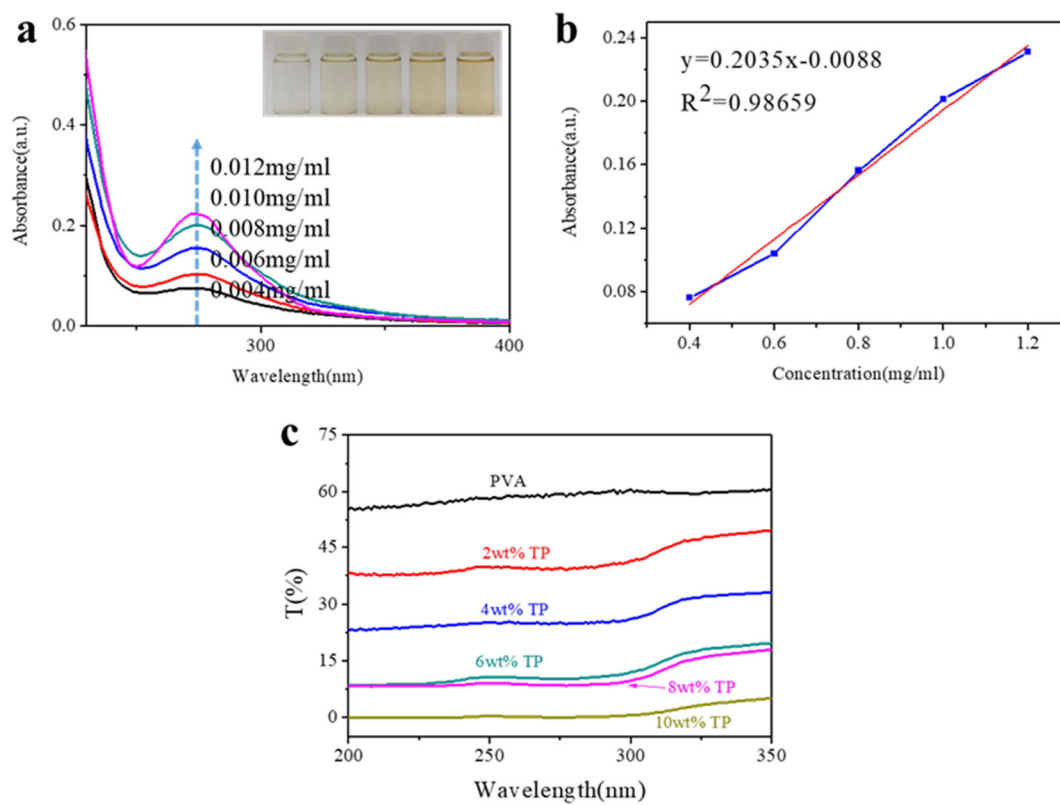

Figure S12. (a) UV-vis absorption spectra of TP dispersions in H<sub>2</sub>O. (b) Correlation of absorbance at 274 nm against the concentration of TP dispersions. (c) Ultraviolet transmission spectra of composite hydrogels at different TP contents.

## Reference

1 G. Li, Q. Yan, H. Xia and Y. Zhao, ACS Appl. Mater. Interfaces, 2015, 7, 12067-12073.
